# Supplementary material for: Implications of nutritional stress as nestling or fledgling on subsequent attractiveness and fecundity in zebra finches (Taeniopygia guttata)
Source: PeerJ. 2017 Aug 21;5:e3628. doi: 10.7717/peerj.3628 (PMC5572542; doi:10.7717/peerj.3628)
Supplement: Supplemental Information 1 [file peerj-05-3628-s001.xlsx]

## Sheet: FemaleChoice
Ring	Treatment	Test	Diet	Pair	Choice	Song	Cheek
w384	Lower	LH_HL	LH	1	0	0	1.71
w355	Lower	LH_HL	LH	2	11.44	0	1.73
w302	Lower	LH_HL	LH	3	20.33	8	1.23
w398	Lower	LH_HL	LH	4	0	44	2.48
w336	Lower	LH_HL	LH	5	19.84	12	1.09
w373	Lower	LH_HL	LH	6	4.79	22	2.16
w337	Lower	LH_HL	LH	7	10.09	13	1.16
w319	Lower	LH_HL	LH	8	0.36	23
w361	Lower	LH_HL	LH	9	1.07	15	0.36
w331	Lower	LH_HL	LH	10	9.26	24	1.82
w374	Lower	LH_HL	LH	11	4.17	48	1.65
w329	Lower	LH_HL	LH	12	13.3	18	1.91
w320	Lower	LH_HL	LH	13	11.47	51	1.25
w371	Lower	LH_HL	LH	14	9.21	24	1.41
w399	Lower	LH_HL	LH	15	0	53	1.67
w384	Lower	LH_HH	LH	16	21.24	0	1.71
w329	Lower	LH_HH	LH	17	0.14	8	1.91
w331	Lower	LH_HH	LH	18	2.75	26	1.82
w320	Lower	LH_HH	LH	19	12.04	14	1.25
w398	Lower	LH_HH	LH	20	8.79	25	2.48
w319	Lower	LH_HH	LH	21	20.1	53
w371	Lower	LH_HH	LH	22	9.81	15	1.41
w399	Lower	LH_HH	LH	23	20.12	61	1.67
w302	Lower	LH_HH	LH	24	10.08	9	1.23
w337	Lower	LH_HH	LH	25	10.21	44	1.16
w355	Lower	LH_HH	LH	26	0.45	52	1.73
w361	Lower	LH_HH	LH	27	16.95	22	0.36
w364	Lower	HL_HH	HL	28	0	0	1.15
w409	Lower	HL_HH	HL	29	10.02	1	1.81
w316	Lower	HL_HH	HL	30	20.76	26	1.23
w365	Lower	HL_HH	HL	31	5.92	21	2.38
w339	Lower	HL_HH	HL	32	10.11	12	1.85
w387	Lower	HL_HH	HL	33	10.7	34
w418	Lower	HL_HH	HL	34	10.71	30	0.19
w340	Lower	HL_HH	HL	35	10.79	10	1.94
w343	Lower	HL_HH	HL	36	10.72	54	1.25
w344	Lower	HL_HH	HL	37	10.38	29
w346	Lower	HL_HH	HL	38	0	57	1.73
w343	Higher	LH_HL	HL	1	18.61	7	1.25
w339	Higher	LH_HL	HL	2	7.94	13	1.85
w316	Higher	LH_HL	HL	3	0	41	1.23
w346	Higher	LH_HL	HL	4	10.03	91	1.73
w304	Higher	LH_HL	HL	5	0	19	2.21
w348	Higher	LH_HL	HL	6	9.81	32	1.75
w387	Higher	LH_HL	HL	7	10.09	17	0.36
w344	Higher	LH_HL	HL	8	10.71	30
w403	Higher	LH_HL	HL	9	22.5	11	0.59
w340	Higher	LH_HL	HL	10	9.08	14	1.94
w303	Higher	LH_HL	HL	11	14.81	15	1.8
w391	Higher	LH_HL	HL	12	6.24	5	1.19
w365	Higher	LH_HL	HL	13	9.94	11	2.38
w418	Higher	LH_HL	HL	14	10.79	5	0.19
w364	Higher	LH_HL	HL	15	14.32	0	1.15
w327	Higher	LH_HH	HH	16	7.41	35	2.35
w308	Higher	LH_HH	HH	17	19.08	27	1.91
w413	Higher	LH_HH	HH	18	18.05	43	3.02
w306	Higher	LH_HH	HH	19	6.34	23	0.2
w324	Higher	LH_HH	HH	20	10.15	24	1.7
w412	Higher	LH_HH	HH	21	0	40
w395	Higher	LH_HH	HH	22	9.81	11	1.14
w397	Higher	LH_HH	HH	23	0	44	1.13
w333	Higher	LH_HH	HH	24	10.1	6	0.89
w328	Higher	LH_HH	HH	25	9.88	27	1.03
w307	Higher	LH_HH	HH	26	18.73	17	0.16
w352(323)	Higher	LH_HH	HH	27	1.17	6	0.94
w324	Higher	HL_HH	HH	28	20.14	37	1.7
w413	Higher	HL_HH	HH	29	10.14	25	3.02
w352(323)	Higher	HL_HH	HH	30	0	54	0.94
w327	Higher	HL_HH	HH	31	9.26	16	2.35
w395	Higher	HL_HH	HH	32	10.02	9	1.14
w412	Higher	HL_HH	HH	33	9.83	25
w306	Higher	HL_HH	HH	34	3.1	21	0.2
w308	Higher	HL_HH	HH	35	10.13	7	1.91
w328	Higher	HL_HH	HH	36	9.86	34	1.03
w307	Higher	HL_HH	HH	37	1.33	10
w333	Higher	HL_HH	HH	38	10.72	12	0.89

## Sheet: MaleChoice
Ring	Treatment	Pair	Diet	Test	Choice	Song
w362	Lower	1	LH	LowHigh_HighLow	0	0
w318	Lower	2	LH	LowHigh_HighLow	0	0
w301	Lower	3	LH	LowHigh_HighLow	0	0
w351	Lower	4	LH	LowHigh_HighLow	0	0
w388	Lower	5	LH	LowHigh_HighLow	0.06	0
w360	Lower	6	LH	LowHigh_HighLow	5.54	29
w411	Lower	7	LH	LowHigh_HighLow	6.93	15
w429	Lower	8	LH	LowHigh_HighLow	8.84	24
w368	Lower	9	LH	LowHigh_HighLow	9.05	27
w354	Lower	10	LH	LowHigh_HighLow	10.01	5
w350	Lower	11	LH	LowHigh_HighLow	10.12	21
w400	Lower	12	LH	LowHigh_HighLow	12.07	9
w317	Lower	13	LH	LowHigh_HighLow	16.87	16
w389	Lower	14	LH	LowHigh_HighLow	21.24	0
w334	Higher	15	HH	HighHigh_LowHigh	0	0
w394	Higher	16	HH	HighHigh_LowHigh	0	0
w376	Higher	17	HH	HighHigh_LowHigh	2.49	3
w378	Higher	18	HH	HighHigh_LowHigh	5.37	1
w356	Higher	19	HH	HighHigh_LowHigh	5.71	0
w332	Higher	20	HH	HighHigh_LowHigh	6.07	0
w396	Higher	21	HH	HighHigh_LowHigh	6.84	6
w322	Higher	22	HH	HighHigh_LowHigh	7.29	6
w415	Higher	23	HH	HighHigh_LowHigh	8.4	14
w375	Higher	24	HH	HighHigh_LowHigh	9.99	3
w326	Higher	25	HH	HighHigh_LowHigh	10.07	16
w359	Higher	26	HH	HighHigh_LowHigh	11.66	0
w321	Higher	27	HH	HighHigh_LowHigh	12.6	28
w379	Higher	28	HH	HighHigh_HighLow	20.03	16
w315	Lower	29	HL	HighHigh_HighLow	0	0
w402	Lower	30	HL	HighHigh_HighLow	2.74	0
w419	Lower	31	HL	HighHigh_HighLow	5.44	16
w363	Lower	32	HL	HighHigh_HighLow	6.07	9
w310	Lower	33	HL	HighHigh_HighLow	6.79	7
w341	Lower	34	HL	HighHigh_HighLow	9.85	7
w404	Lower	35	HL	HighHigh_HighLow	9.99	0
w386	Lower	36	HL	HighHigh_HighLow	10.02	0
w309	Lower	37	HL	HighHigh_HighLow	10.13	15
w314	Lower	38	HL	HighHigh_HighLow	10.17	4
w345	Lower	39	HL	HighHigh_HighLow	10.2	2
w347	Lower	40	HL	HighHigh_HighLow	11.89	20
w342	Lower	41	HL	HighHigh_HighLow	12.3	7
w335	Lower	42	HL	HighHigh_HighLow	18.89	0
w311	Lower	43	HL	HighHigh_HighLow	19.89	17
w408	Lower	44	HL	HighHigh_HighLow	20.04	3
w347	Higher	1	HL	LowHigh_HighLow	10.16	21
w310	Higher	2	HL	LowHigh_HighLow	10.34	43
w408	Higher	3	HL	LowHigh_HighLow	15.87	0
w335	Higher	4	HL	LowHigh_HighLow	20.06	23
w315	Higher	5	HL	LowHigh_HighLow	19.89	21
w311	Higher	6	HL	LowHigh_HighLow	11.44	26
w345	Higher	7	HL	LowHigh_HighLow	10.36	2
w402	Higher	8	HL	LowHigh_HighLow	14.6	21
w419	Higher	9	HL	LowHigh_HighLow	10.12	0
w314	Higher	10	HL	LowHigh_HighLow	9.95	12
w341	Higher	11	HL	LowHigh_HighLow	8.84	27
w386	Higher	12	HL	LowHigh_HighLow	3	0
w342	Higher	13	HL	LowHigh_HighLow	3.56	0
w309	Higher	14	HL	LowHigh_HighLow	0	0
w301	Lower	15	LH	HighHigh_LowHigh	19.97	6
w354	Lower	16	LH	HighHigh_LowHigh	19.79	4
w388	Lower	17	LH	HighHigh_LowHigh	10.44	3
w351	Lower	18	LH	HighHigh_LowHigh	0	0
w360	Lower	19	LH	HighHigh_LowHigh	5.02	0
w411	Lower	20	LH	HighHigh_LowHigh	13.27	6
w368	Lower	21	LH	HighHigh_LowHigh	6.77	23
w317	Lower	22	LH	HighHigh_LowHigh	12.99	15
w400	Lower	23	LH	HighHigh_LowHigh	11.79	22
w350	Lower	24	LH	HighHigh_LowHigh	9.49	10
w389	Lower	25	LH	HighHigh_LowHigh	10.2	10
w362	Lower	26	LH	HighHigh_LowHigh	1.16	5
w429	Lower	27	LH	HighHigh_LowHigh	4.92	11
w318	Lower	28	LH	HighHigh_LowHigh	0	0
w322	Higher	29	HH	HighHigh_HighLow	19.56	22
w378	Higher	30	HH	HighHigh_HighLow	16.99	0
w379	Higher	31	HH	HighHigh_HighLow	13.97	34
w376	Higher	32	HH	HighHigh_HighLow	12.89	26
w415	Higher	33	HH	HighHigh_HighLow	6.72	4
w356	Higher	34	HH	HighHigh_HighLow	10.19	11
w396	Higher	35	HH	HighHigh_HighLow	9.98	0
w377	Higher	36	HH	HighHigh_HighLow	10.05	0
w334	Higher	37	HH	HighHigh_HighLow	0	0
w370	Higher	38	HH	HighHigh_HighLow	9.43	28
w332	Higher	39	HH	HighHigh_HighLow	10.24	2
w375	Higher	40	HH	HighHigh_HighLow	12.02	16
w359	Higher	41	HH	HighHigh_HighLow	7.86	19
w326	Higher	42	HH	HighHigh_HighLow	1.6	0
w321	Higher	43	HH	HighHigh_HighLow	0	0
w394	Higher	44	HH	HighHigh_HighLow	0	0

## Sheet: Eggs
Females	f_group	#eggs	first nest	first egg
w310	2	6	6	6
w334(901)	3	4	2	6
w318	1	5	2	6
w356	3	4	2	9
w402	2	6	13	16
w368(353)	1	6	16	18
w400	1	5	8	6
w315	2	5	4	19
w317	1	4	2	6
w342	2	5	2	7
w375	3	4	2	27
w377	3	4	2	8
w379	3	4	70	77
w386	2	4	2	6
w389	1	2	2	6
w376	3	5	2	7
w301	1	5	42	43
w309	2	5	28	83
w322	3	4	28	67
w350	1	6	4	6
w394	3	4	37	39
w411(385)	1	3	38	51
w311	2	5	27	29
w335	2	4	5	9
w341	2	3	8	10
w360	1	4	2	8
w378	3	4	38	41
w419	2	4	2	6
w314	2	1	2	15
w321	3	1	13	12
w332	3	6	2	5
w345	2	9	7	7
w351	1	6	18	29
w354	1	5	10	6
w362	1	5	0	7
w363	2	12	2	19
w388	1	7	2	5
w408	2	2	90	29
w429	1	3	49	8

## Sheet: Hatchlings
Females	f_group	#hatchlings	hatchrate	latency_1.hatchling
w310	2	1	0.17	18
w341	2	1	0.33	14
w378	3	1	0.25	16
w419	2	1	0.25	15
w334(901)	3	2	0.5	15
w315	2	2	0.4	15
w317	1	2	0.5	18
w389	1	2	1	14
w368(353)	1	3	0.5	13
w400	1	3	0.6	17
w301	1	3	0.6	14
w309	2	3	0.6	15
w322	3	3	0.75	14
w350	1	3	0.5	15
w411(385)	1	3	1	14
w360	1	3	0.75	13
w318	1	4	0.8	15
w356	3	4	1	15
w342	2	4	0.8	15
w375	3	4	1	14
w377	3	4	1	16
w379	3	4	1	15
w386	2	4	1	17
w394	3	4	1	15
w311	2	4	0.8	36
w335	2	4	1	17
w402	2	5	0.83	13
w376	3	5	1	14

## Sheet: HatchingMass
Weighd0	Mother	Mother_group	Mother1_mass	Mother2_mass	Sex
0.61	w301	1	9.14	10.1	1
0.47	w301	1	9.14	10.1	2
0.63	w301	1	9.14	10.1	2
0.53	w309	2	9.28	12.83	1
0.64	w309	2	9.28	12.83	2
0.4	w309	2	9.28	12.83	2
0.67	w310	2	9.01	13.53	1
0.69	w311	2	8.86	11.56	1
0.75	w311	2	8.86	11.56	2
0.76	w311	2	8.86	11.56	2
0.65	w311	2	8.86	11.56	2
0.59	w315	2	8.72	11.56	1
0.64	w315	2	8.72	10.93	2
0.64	w317	1	9.03	10.97	1
0.64	w317	1	9.03	10.97	2
0.68	w318	1	8.66	11.83	1
0.57	w318	1	8.66	11.83	1
0.61	w318	1	8.66	11.83	1
0.59	w318	1	8.66	11.83	2
0.55	w322	3	8.94	12.14	1
0.49	w322	3	8.94	12.14	2
0.69	w322	3	8.94	12.14	2
0.72	w332	3	9.77	13.22	1
0.77	w332	3	9.77	13.22	1
0.69	w332	3	9.77	13.22	2
0.9	w334	3	9.77	14.5	1
0.85	w334	3	9.77	14.5	1
0.59	w335	2	9.31	12.57	1
0.62	w335	2	9.31	12.57	2
0.66	w335	2	9.31	12.57	2
0.64	w335	2	9.31	12.57	2
0.48	w341	2	9.27	11.7	2
0.77	w342	2	9.27	11.27	1
0.69	w342	2	9.27	11.27	1
0.61	w342	2	9.27	11.27	2
0.74	w342	2	9.27	11.27	2
0.51	w345	2	8.86	11.85	2
0.58	w345	2	8.86	11.85	2
0.61	w350	1	5.75	11.27	1
0.48	w350	1	5.75	11.27	2
0.55	w350	1	5.75	11.27	2
0.5	w351	1	6.39	11.31	2
0.83	w356	3	9.33	12.75	1
0.93	w356	3	9.33	12.75	1
1.06	w356	3	9.33	12.75	1
0.86	w356	3	9.33	12.75	2
0.74	w360	1	9.8	12.46	2
0.66	w360	1	9.8	12.46	2
0.42	w360	1	9.8	12.46	2
0.53	w368(353)	1	7.8	10.74	1
0.62	w368(353)	1	7.8	10.74	1
0.59	w368(353)	1	7.8	10.74	2
0.62	w375	3	8.52	12.16	1
0.64	w375	3	8.52	12.16	2
0.55	w375	3	8.52	12.16	2
0.51	w375	3	8.52	12.16	1
0.71	w376	3	9.05	13.16	1
0.75	w376	3	9.05	13.16	1
0.91	w376	3	9.05	13.16	2
0.8	w376	3	9.05	13.16	2
0.79	w376	3	9.05	13.16	2
0.53	w377	3	7.87	9.92	1
0.8	w377	3	7.87	9.92	1
0.59	w377	3	7.87	9.92	2
0.86	w377	3	7.87	9.92	2
0.74	w378	3	9.13	12.04	2
0.82	w379	3	8.29	11.75	1
0.74	w379	3	8.29	11.75	1
0.67	w379	3	8.29	11.75	2
0.75	w379	3	8.29	11.75	2
0.54	w386	2	11.12	13.15	1
0.61	w386	2	11.12	13.15	1
0.66	w386	2	11.12	13.15	2
0.59	w386	2	11.12	13.15	2
0.61	w389	1	6.66	12.82	1
0.45	w389	1	6.66	12.82	2
0.62	w394	3	9.23	11.38	0
0.5	w394	3	9.23	11.38	1
0.45	w394	3	9.23	11.38	2
0.69	w394	3	9.23	11.38	2
0.63	w400	1	7.66	10.76	1
0.61	w400	1	7.66	10.76	1
0.66	w400	1	7.66	10.76	2
0.6	w402	2	8.38	11.21	1
0.62	w402	2	8.38	11.21	1
0.69	w402	2	8.38	11.21	1
0.53	w402	2	8.38	11.21	2
0.54	w408	2	9.41	11.43	1
0.66	w408	2	9.41	11.43	2
0.44	w411(385)	1	4.84	8.82	1
0.44	w411(385)	1	4.84	8.82	2
0.45	w411(385)	1	4.84	8.82	2
0.53	w419	2	8.64	11.05	2
